# Supplementary material for: Recipient Pericardial Apolipoprotein Levels Might Be an Indicator of Worse Outcomes after Orthotopic Heart Transplantation
Source: MDPI journal article supplement (doi:10.3390/ijms25031752), 2024-02-01
Supplement: s1 [file s1]

## SUPPLEMENTARY TABLES

**Figure S1. Correlations with preoperative laboratory parameters**

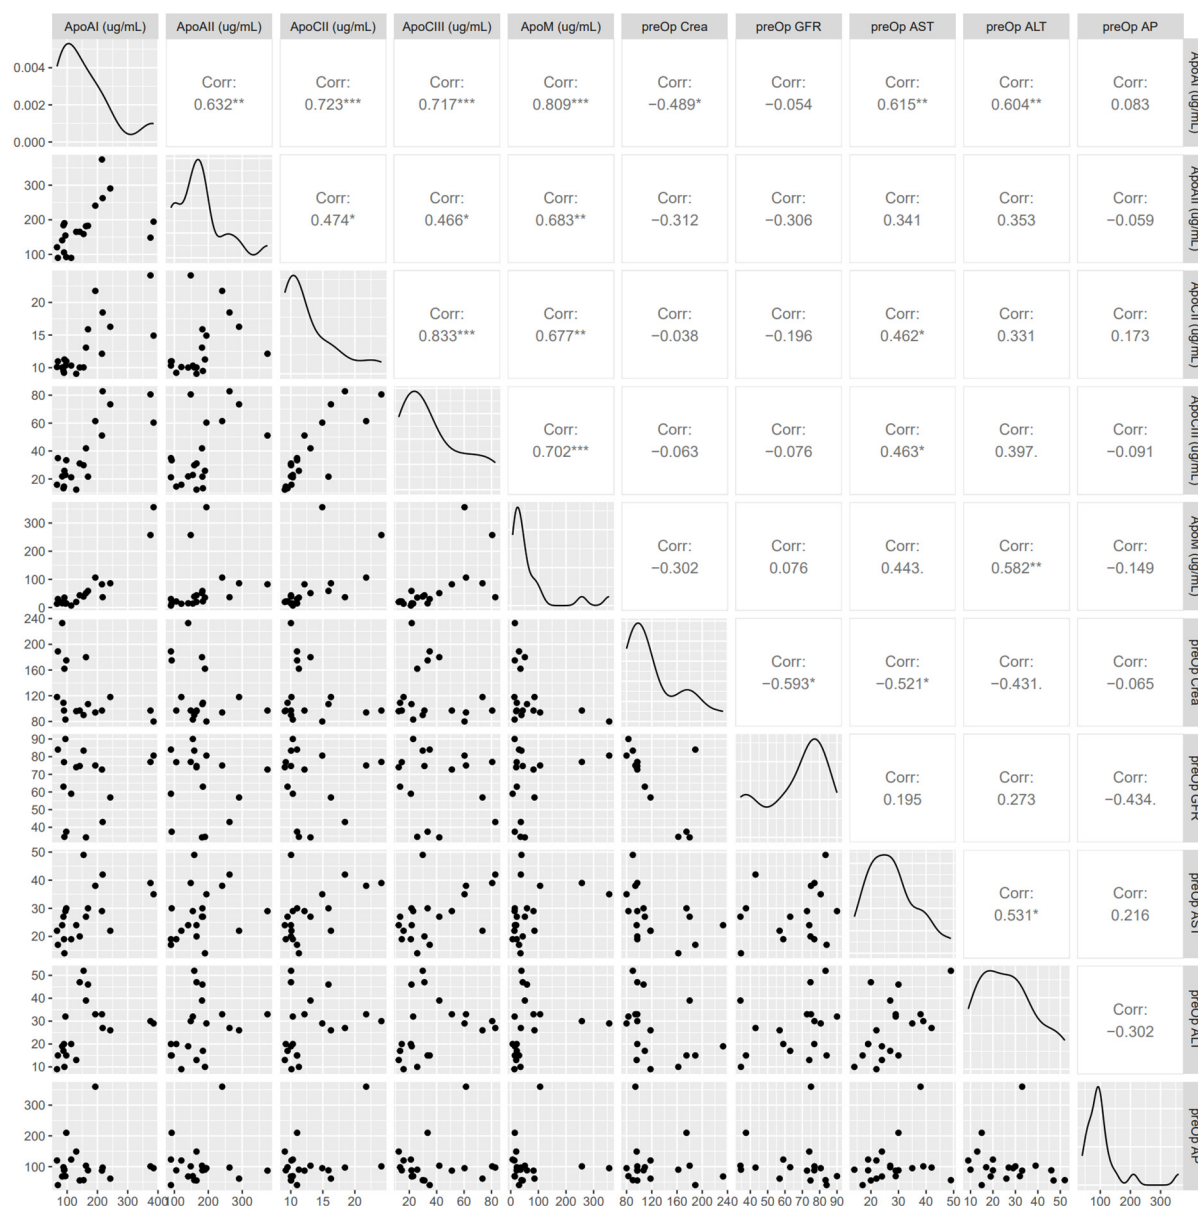

*AOPP: advanced oxidation protein products; ALP: alkaline phosphatase; ALT: alanine transaminase, Apo: apolipoprotein; AST: aspartate aminotransferase; GGT: gamma-glutamyl transpeptidase; IL: interleukin; LDH: lactate dehydrogenase; T3: triiodothyronine; T4: thyroxine; TNF: tumor necrosis factor*

**Figure S2. Correlations with postoperative laboratory parameters**

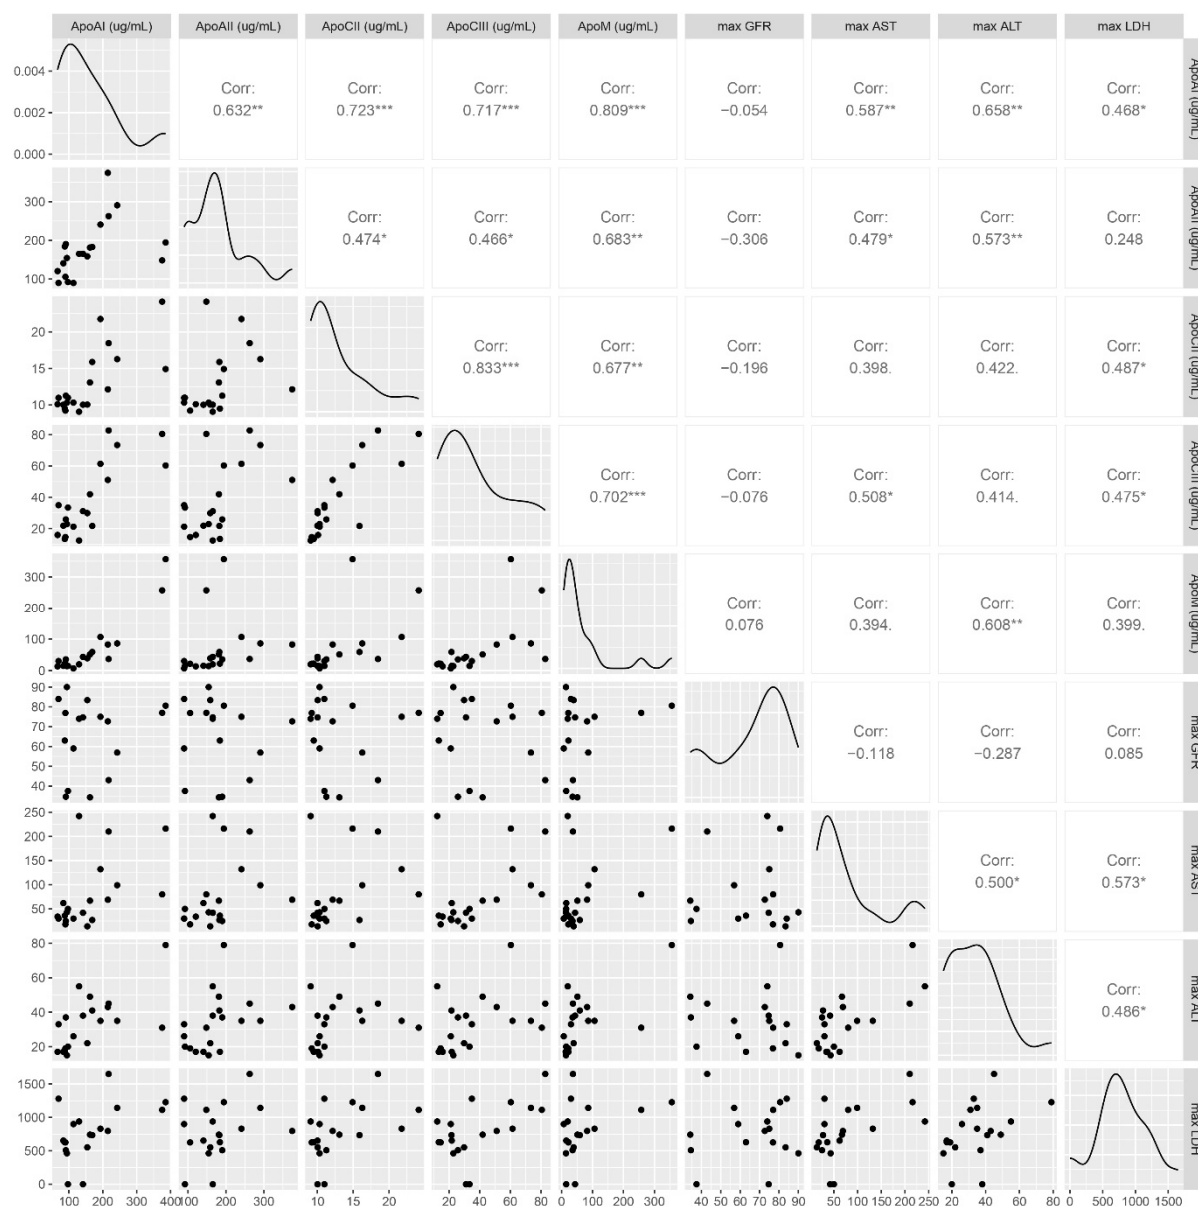

*AOPP: advanced oxidation protein products; ALP: alkaline phosphatase; ALT: alanine transaminase, Apo: apolipoprotein; AST: aspartate aminotransferase; GGT: gamma-glutamyl transpeptidase; IL: interleukin; LDH: lactate dehydrogenase; T3: triiodothyronine; T4: thyroxine; TNF: tumor necrosis factor*

**Table S1. Relationship between recipient interleukin levels and primary graft dysfunction**

|                      | No PGD |               | PGD    |               | p value |
|----------------------|--------|---------------|--------|---------------|---------|
|                      | Median | IQR (25-75)   | Median | IQR (25-75)   |         |
| thiol (414 nm)       | 0.00   | 0.00-2.05     | 1.58   | 0.00-5.27     | 0.385   |
| thiol (405 nm)       | 0.00   | 0.00-1.93     | 0.75   | 0.0-5.28      | 0.682   |
| IFN $\gamma$ (pg/mL) | 2.28   | 1.50-2.78     | 5.35   | 1.17-8.14     | 0.211   |
| IL-17A (pg/mL)       | 8.50   | 8.42-8.60     | 8.97   | 8.44-9.33     | 0.178   |
| IL-17F (pg/mL)       | 17.23  | 16.99-17.90   | 20.72  | 17.27-24.28   | 0.211   |
| IL-21 (pg/mL)        | 30.13  | 18.39-43.88   | 31.91  | 20.83-50.30   | 0.750   |
| IL-22 (pg/mL)        | 17.11  | 17.09-17.13   | 17.13  | 17.09-17.22   | 0.494   |
| IL-4 (pg/mL)         | 21.59  | 17.25-25.71   | 45.89  | 23.54-61.73   | 0.064   |
| TNF (pg/mL)          | 3.18   | 3.06-3.35     | 3.67   | 3.09-4.00     | 0.211   |
| IL-10 (pg/mL)        | 19.30  | 6.10-19.30    | 12.70  | 6.10-49.00    | 0.963   |
| IL-13 (pg/mL)        | 5.72   | 5.63-5.99     | 7.28   | 5.7-9.34      | 0.211   |
| IL-2 (pg/mL)         | 20.13  | 15.11-27.82   | 49.57  | 16.78-77.33   | 0.178   |
| IL-5 (pg/mL)         | 0.98   | 0.88-1.12     | 1.65   | 0.86-1.86     | 0.178   |
| IL-6 (pg/mL)         | 200.06 | 27.29-580.64  | 251.41 | 46.89-705.01  | 0.892   |
| IL-9 (pg/mL)         | 17.55  | 16.74-19.88   | 18.23  | 17.17-21.71   | 0.554   |
| Leptin (ng/mL)       | 7.54   | 6.71-10.44    | 6.36   | 5.55-6.62     | 0.029   |
| Adiponectin (ng/mL)  | 37.44  | 26.85-47.34   | 20.58  | 17.49-46.90   | 0.335   |
| Adipsin (ng/mL)      | 683.52 | 597.48-783.62 | 657.55 | 585.08-739.55 | 0.750   |
| oxLDL (ng/mL)        | 461.39 | 339.93-687.64 | 304.20 | 232.75-761.47 | 0.437   |
| ApoAI (ug/mL)        | 127.57 | 90.12-187.11  | 172.59 | 84.68-216.75  | 0.820   |
| ApoAII (ug/mL)       | 161.99 | 125.58-188.69 | 213.85 | 108.73-346.45 | 0.494   |
| ApoB100 (ug/mL)      | 328.82 | 226.70-570.65 | 307.38 | 258.85-762.86 | 0.963   |
| ApoCII (ug/mL)       | 10.65  | 10.03-15.64   | 11.55  | 9.55-16.87    | 1.000   |
| ApoCIII (ug/mL)      | 27.82  | 21.28-55.72   | 43.00  | 17.96-74.85   | 0.554   |
| ApoD (ug/mL)         | 13.30  | 8.92-22.51    | 16.47  | 10.85-25.31   | 0.617   |
| ApoE4 (ug/mL)        | 0.00   | 0.00-0.00     | 0.00   | 0.00-0.00     | 0.750   |
| ApoH (ug/mL)         | 0.00   | 0.00-8.42     | 2.48   | 0.00-8.99     | 0.820   |
| ApoJ (ug/mL)         | 0.00   | 0.00-0.00     | 0.00   | 0.00-22.59    | 0.892   |
| ApoM (ug/mL)         | 37.14  | 14.81-79.29   | 33.42  | 22.39-71.05   | 1.000   |
| AOPP                 | 0.00   | 0.00-0.70     | 0.00   | 0.00-0.00     | 0.494   |
| T3 (pg/mL)           | 3.48   | 2.83-4.01     | 3.53   | 2.37-3.97     | 0.892   |
| T4 (ug/dL)           | 4.62   | 4.18-5.31     | 4.42   | 3.61-5.70     | 0.617   |

*AOPP: advanced oxidation protein products; Apo: apolipoprotein; IFN $\gamma$ : interferon- $\gamma$ ; IL: interleukin; IQR: interquartile range; PGD: primary graft dysfunction; oxLDL: oxidized low-density lipoprotein; T3: triiodothyronine; T4: thyroxine; TNF: tumor necrosis factor*

**Table S2. Relationship between recipient interleukin levels and postoperative mechanical circulatory support**

|                     | No MCS |               | MCS    |                | p value |
|---------------------|--------|---------------|--------|----------------|---------|
|                     | Median | IQR (25-75)   | Median | IQR (25-75)    |         |
| thiol (414 nm)      | 0.00   | 0.00-2.10     | 0.00   | 0.00-4.57      | 0.612   |
| thiol (405 nm)      | 0.00   | 0.00-2.08     | 0.00   | 0.00-4.02      | 1.000   |
| IFNg (pg/mL)        | 2.35   | 1.46-2.86     | 3.79   | 1.25-7.73      | 0.306   |
| IL-17A (pg/mL)      | 8.50   | 8.42-8.60     | 8.86   | 8.37-9.25      | 0.349   |
| IL-17F (pg/mL)      | 17.25  | 16.99-17.96   | 20.20  | 16.64-23.27    | 0.445   |
| IL-21 (pg/mL)       | 29.62  | 18.24-39.98   | 35.75  | 23.25-50.17    | 0.445   |
| IL-22 (pg/mL)       | 17.11  | 17.11-17.13   | 17.11  | 17.08-17.20    | 1.000   |
| IL-4 (pg/mL)        | 22.45  | 17.25-25.93   | 39.81  | 16.81-58.48    | 0.395   |
| TNF (pg/mL)         | 3.18   | 3.05-3.36     | 3.37   | 3.11-3.99      | 0.230   |
| IL-10 (pg/mL)       | 19.30  | 6.10-19.30    | 19.30  | 6.10-39.10     | 0.933   |
| IL-13 (pg/mL)       | 5.72   | 5.64-5.99     | 7.04   | 5.43-8.73      | 0.553   |
| IL-2 (pg/mL)        | 20.13  | 14.78-29.50   | 38.86  | 14.78-71.65    | 0.266   |
| IL-5 (pg/mL)        | 0.98   | 0.87-1.12     | 1.45   | 0.79-1.86      | 0.349   |
| IL-6 (pg/mL)        | 182.30 | 26.47-612.01  | 390.38 | 68.74-648.22   | 0.612   |
| IL-9 (pg/mL)        | 17.54  | 16.72-20.10   | 19.11  | 17.24-20.89    | 0.349   |
| Leptin (ng/mL)      | 7.61   | 6.70-10.50    | 6.53   | 5.77-6.81      | 0.042   |
| Adiponectin (ng/mL) | 37.04  | 26.17-45.03   | 21.29  | 18.29-99.93    | 0.933   |
| Adipsin (ng/mL)     | 705.01 | 607.55-788.67 | 640.79 | 580.32-717.80  | 0.445   |
| oxLDL (ng/mL)       | 451.86 | 337.54-594.76 | 347.07 | 242.28-875.79  | 0.933   |
| ApoAI (ug/mL)       | 113.50 | 89.79-169.01  | 193.14 | 99.83-216.18   | 0.553   |
| ApoAII (ug/mL)      | 158.66 | 120.53-184.14 | 240.82 | 127.55-318.48  | 0.230   |
| ApoB100 (ug/mL)     | 327.02 | 216.72-451.73 | 350.28 | 260.73-1065.77 | 0.395   |
| ApoCII (ug/mL)      | 10.32  | 10.03-14.91   | 12.14  | 10.02-20.00    | 0.497   |
| ApoCIII (ug/mL)     | 25.82  | 21.17-41.92   | 51.08  | 23.61-72.09    | 0.266   |
| ApoD (ug/mL)        | 12.02  | 8.86-21.84    | 19.31  | 11.78-25.80    | 0.306   |
| ApoE4 (ug/mL)       | 0.00   | 0.00-0.00     | 0.00   | 0.00-0.00      | 0.672   |
| ApoH (ug/mL)        | 0.00   | 0.00-10.66    | 1.70   | 0.00-7.64      | 0.612   |
| ApoJ (ug/mL)        | 0.00   | 0.00-0.00     | 0.00   | 0.00-15.06     | 1.000   |
| ApoM (ug/mL)        | 35.39  | 14.73-58.89   | 36.66  | 24.98-94.47    | 0.553   |
| AOPP                | 0.00   | 0.00-0.00     | 0.00   | 0.00-3.21      | 0.933   |
| T3 (pg/mL)          | 3.66   | 2.83-4.05     | 3.28   | 2.65-3.93      | 0.800   |
| T4 (ug/dL)          | 4.68   | 4.23-5.37     | 4.23   | 3.59-5.34      | 0.230   |

*AOPP: advanced oxidation protein products; Apo: apolipoprotein; IFNg: interferon- $\gamma$ ; IL: interleukin; IQR: interquartile range; MCS: mechanical circulatory support; oxLDL: oxidized low-density lipoprotein; T3: triiodothyronine; T4: thyroxine; TNF: tumor necrosis factor*

**Table S3. Relationship between recipient interleukin levels and vasoplegia**

|                     | No Vasoplegia |                | Vasoplegia |               | p value |
|---------------------|---------------|----------------|------------|---------------|---------|
|                     | Median        | IQR (25-75)    | Median     | IQR (25-75)   |         |
| thiol (414 nm)      | 0.00          | 0.00-2.15      | 0.94       | 0.00-4.95     | 0.617   |
| thiol (405 nm)      | 0.00          | 0.00-1.93      | 0.74       | 0.00-5.28     | 0.750   |
| IFNg (pg/mL)        | 2.39          | 1.64-3.71      | 1.53       | 0.59-3.17     | 0.211   |
| IL-17A (pg/mL)      | 8.54          | 8.45-8.81      | 8.42       | 8.33-8.60     | 0.178   |
| IL-17F (pg/mL)      | 17.57         | 17.02-19.75    | 17.01      | 16.44-17.91   | 0.178   |
| IL-21 (pg/mL)       | 30.13         | 18.52-46.94    | 29.64      | 20.70-32.87   | 0.750   |
| IL-22 (pg/mL)       | 17.11         | 17.11-17.13    | 17.08      | 17.08-17.15   | 0.211   |
| IL-4 (pg/mL)        | 23.32         | 17.25-38.08    | 25.59      | 18.11-38.08   | 1.000   |
| TNF (pg/mL)         | 3.25          | 3.12-3.37      | 3.10       | 3.00-3.36     | 0.211   |
| IL-10 (pg/mL)       | 19.30         | 6.10-19.3      | 12.70      | 6.10-29.20    | 0.820   |
| IL-13 (pg/mL)       | 5.94          | 5.64-6.89      | 5.65       | 5.36-6.15     | 0.249   |
| IL-2 (pg/mL)        | 22.14         | 17.12-36.86    | 15.45      | 10.76-32.17   | 0.211   |
| IL-5 (pg/mL)        | 1.03          | 0.93-1.39      | 0.87       | 0.71-1.15     | 0.148   |
| IL-6 (pg/mL)        | 225.56        | 26.22-684.09   | 165.13     | 47.96-262.20  | 0.682   |
| IL-9 (pg/mL)        | 17.91         | 16.84-20.33    | 17.33      | 16.82-17.56   | 0.385   |
| Leptin (ng/mL)      | 6.85          | 5.98-8.97      | 8.98       | 6.76-11.21    | 0.335   |
| Adiponectin (ng/mL) | 33.93         | 19.86-53.61    | 31.61      | 22.51-41.53   | 0.750   |
| Adipsin (ng/mL)     | 654.83        | 597.48-1758.71 | 757.50     | 581.52-921.98 | 0.437   |
| oxLDL (ng/mL)       | 447.10        | 339.93-694.79  | 361.36     | 173.21-663.83 | 0.385   |
| ApoAI (ug/mL)       | 113.75        | 88.43-187.11   | 178.34     | 120.53-235.64 | 0.290   |
| ApoAII (ug/mL)      | 161.92        | 125.58-188.69  | 227.97     | 108.71-353.48 | 0.437   |
| ApoB100 (ug/mL)     | 324.93        | 256.72-441.92  | 593.94     | 209.66-890.51 | 0.682   |
| ApoCII (ug/mL)      | 10.98         | 10.03-15.64    | 11.23      | 10.10-15.23   | 0.892   |
| ApoCIII (ug/mL)     | 27.82         | 17.29-55.72    | 41.07      | 23.64-67.84   | 0.554   |
| ApoD (ug/mL)        | 12.34         | 8.92-20.34     | 28.69      | 15.85-37.66   | 0.022   |
| ApoE4 (ug/mL)       | 0.00          | 0.00-0.00      | 0.00       | 0.00-0.00     | 0.750   |
| ApoH (ug/mL)        | 0.00          | 0.00-4.14      | 5.17       | 0.00-10.58    | 0.682   |
| ApoJ (ug/mL)        | 0.00          | 0.00-0.00      | 3.44       | 0.00-24.31    | 0.385   |
| ApoM (ug/mL)        | 32.78         | 16.23-56.95    | 62.10      | 16.08-85.20   | 0.682   |
| AOPP                | 0.00          | 0.00-0.07      | 0.00       | 0.00-0.00     | 0.494   |
| T3 (pg/mL)          | 3.67          | 2.83-4.04      | 3.15       | 1.57-3.57     | 0.211   |
| T4 (ug/dL)          | 4.46          | 4.08-4.88      | 5.52       | 4.45-6.02     | 0.178   |

*AOPP: advanced oxidation protein products; Apo: apolipoprotein; IFNg: interferon- $\gamma$ ; IL: interleukin; IQR: interquartile range; oxLDL: oxidized low-density lipoprotein; T3: triiodothyronine; T4: thyroxine; TNF: tumor necrosis factor*

**Table S4. Relationship between recipient interleukin levels and mortality**

|                      | No Mortality |               | Mortality |                | p value |
|----------------------|--------------|---------------|-----------|----------------|---------|
|                      | Median       | IQR (25-75)   | Median    | IQR (25-75)    |         |
| thiol (414 nm)       | 0.00         | 0.00-2.10     | 0.00      | 0.00-4.57      | 0.612   |
| thiol (405 nm)       | 0.00         | 0.00-2.08     | 0.00      | 0.00-4.02      | 1.000   |
| IFN $\gamma$ (pg/mL) | 2.21         | 1.46-2.86     | 3.47      | 1.32-5.35      | 0.445   |
| IL-17A (pg/mL)       | 8.49         | 8.42-8.66     | 8.57      | 8.44-8.97      | 0.445   |
| IL-17F (pg/mL)       | 17.21        | 16.99-18.18   | 17.96     | 16.95-20.72    | 0.445   |
| IL-21 (pg/mL)        | 30.65        | 18.83-45.18   | 28.08     | 17.77-41.764   | 0.672   |
| IL-22 (pg/mL)        | 17.11        | 17.11-17.13   | 17.11     | 17.08-17.13    | 0.349   |
| IL-4 (pg/mL)         | 20.72        | 17.25-32.87   | 24.19     | 20.28-45.89    | 0.395   |
| TNF (pg/mL)          | 3.18         | 3.05-3.37     | 3.36      | 3.09-3.69      | 0.497   |
| IL-10 (pg/mL)        | 19.30        | 6.10-19.30    | 6.10      | 6.10-25.90     | 0.497   |
| IL-13 (pg/mL)        | 5.72         | 5.62-6.30     | 5.99      | 5.62-7.28      | 0.445   |
| IL-2 (pg/mL)         | 20.13        | 14.78-29.50   | 30.83     | 16.11-49.57    | 0.306   |
| IL-5 (pg/mL)         | 0.98         | 0.87-1.23     | 1.12      | 0.89-1.66      | 0.306   |
| IL-6 (pg/mL)         | 217.83       | 29.76-612.01  | 112.44    | 22.11-549.25   | 0.553   |
| IL-9 (pg/mL)         | 17.57        | 16.72-20.41   | 17.36     | 16.96-19.61    | 1.000   |
| Leptin (ng/mL)       | 7.61         | 5.90-10.50    | 6.65      | 6.36-6.86      | 0.230   |
| Adiponectin (ng/mL)  | 30.00        | 19.87-43.02   | 45.03     | 18.99-74.48    | 0.553   |
| Adipsin (ng/mL)      | 705.01       | 594.12-788.67 | 640.79    | 576.17-717.80  | 0.445   |
| oxLDL (ng/mL)        | 442.34       | 337.54-594.76 | 509.02    | 285.15-813.87  | 0.553   |
| ApoAI (ug/mL)        | 113.50       | 89.79-162.28  | 217.32    | 142.28-380.36  | 0.066   |
| ApoAII (ug/mL)       | 165.18       | 120.53-184.14 | 194.43    | 119.10-318.48  | 0.395   |
| ApoB100 (ug/mL)      | 319.23       | 216.72-412.51 | 610.30    | 307.38-1009.02 | 0.098   |
| ApoCII (ug/mL)       | 10.31        | 10.02-13.07   | 14.91     | 11.55-21.30    | 0.042   |
| ApoCIII (ug/mL)      | 22.84        | 15.84-33.39   | 60.32     | 43.00-81.66    | 0.005   |
| ApoD (ug/mL)         | 14.57        | 9.50-22.74    | 9.93      | 4.88-23.31     | 0.349   |
| ApoE4 (ug/mL)        | 0.00         | 0.00-0.00     | 0.00      | 0.00-405.68    | 0.197   |
| ApoH (ug/mL)         | 0.00         | 0.00-0.00     | 10.33     | 2.48-36.26     | 0.053   |
| ApoJ (ug/mL)         | 0.00         | 0.00-0.00     | 30.12     | 0.00-44.01     | 0.066   |
| ApoM (ug/mL)         | 22.00        | 14.73-51.12   | 82.52     | 33.42-306.90   | 0.053   |
| AOPP                 | 0.00         | 0.00-0.00     | 0.00      | 0.00-2.28      | 1.00    |
| T3 (pg/mL)           | 3.28         | 2.47-3.90     | 3.84      | 3.44-4.04      | 0.230   |
| T4 (ug/dL)           | 4.56         | 2.23-5.37     | 4.61      | 3.78-5.37      | 0.670   |

*AOPP: advanced oxidation protein products; Apo: apolipoprotein; IFN $\gamma$ : interferon- $\gamma$ ; IL: interleukin; IQR: interquartile range; oxLDL: oxidized low-density lipoprotein; T3: triiodothyronine; T4: thyroxine; TNF: tumor necrosis factor*

**Table S5. Relationship between recipient interleukin levels and rejection**

|                     | No Rejection |               | Rejection |                | p value |
|---------------------|--------------|---------------|-----------|----------------|---------|
|                     | Median       | IQR (25-75)   | Median    | IQR (25-75)    |         |
| thiol (414 nm)      | 0.00         | 0.00-2.15     | 0.00      | 0.00-2.37      | 0.820   |
| thiol (405 nm)      | 0.05         | 0.00-2.17     | 0.00      | 0.00-1.12      | 0.437   |
| IFNg (pg/mL)        | 2.07         | 1.00-3.49     | 2.90      | 2.24-3.71      | 0.385   |
| IL-17A (pg/mL)      | 8.50         | 8.41-8.65     | 8.62      | 8.48-8.81      | 0.335   |
| IL-17F (pg/mL)      | 17.23        | 16.93-18.34   | 17.74     | 17.12-20.43    | 0.554   |
| IL-21 (pg/mL)       | 30.13        | 18.54-45.64   | 27.29     | 17.56-42.83    | 0.750   |
| IL-22 (pg/mL)       | 17.11        | 17.09-17.13   | 17.12     | 17.08-17.15    | 0.892   |
| IL-4 (pg/mL)        | 22.45        | 17.46-40.03   | 23.32     | 17.25-35.91    | 0.750   |
| TNF (pg/mL)         | 3.18         | 3.05-3.41     | 3.35      | 3.26-3.37      | 0.290   |
| IL-10 (pg/mL)       | 12.70        | 6.10-19.30    | 19.30     | 19.30-29.20    | 0.211   |
| IL-13 (pg/mL)       | 5.72         | 5.63-6.42     | 5.99      | 5.70-7.14      | 0.617   |
| IL-2 (pg/mL)        | 20.13        | 13.77-35.52   | 26.82     | 20.80-36.86    | 0.290   |
| IL-5 (pg/mL)        | 0.98         | 0.87-1.21     | 1.17      | 0.97-1.39      | 0.385   |
| IL-6 (pg/mL)        | 200.06       | 28.08-684.09  | 210.07    | 21.81-462.51   | 0.682   |
| IL-9 (pg/mL)        | 17.55        | 16.97-20.33   | 17.96     | 16.74-19.18    | 0.682   |
| Leptin (ng/mL)      | 7.10         | 5.98-9.98     | 6.97      | 6.73-12.67     | 0.617   |
| Adiponectin (ng/mL) | 29.96        | 19.86-42.28   | 74.48     | 35.51-131.70   | 0.039   |
| Adipsin (ng/mL)     | 683.52       | 608.82-781.83 | 634.22    | 557.12-744.93  | 0.554   |
| oxLDL (ng/mL)       | 447.10       | 280.39-687.64 | 428.05    | 339.93-766.24  | 0.820   |
| ApoAI (ug/mL)       | 121.82       | 88.43-167.33  | 205.23    | 116.63-335.76  | 0.178   |
| ApoAII (ug/mL)      | 161.92       | 109.35-183.76 | 215.52    | 158.76-257.10  | 0.178   |
| ApoB100 (ug/mL)     | 323.13       | 226.70-411.68 | 784.69    | 311.30-1202.77 | 0.080   |
| ApoCII (ug/mL)      | 10.32        | 10.02-12.84   | 20.11     | 13.06-23.54    | 0.007   |
| ApoCIII (ug/mL)     | 26.33        | 17.18-40.17   | 70.97     | 34.72-82.22    | 0.029   |
| ApoD (ug/mL)        | 14.10        | 9.20-22.51    | 15.18     | 6.27-23.04     | 0.820   |
| ApoE4 (ug/mL)       | 0.00         | 0.00-0.00     | 0.00      | 0.00-306.56    | 0.554   |
| ApoH (ug/mL)        | 0.00         | 0.00-7.75     | 3.33      | 0.42-29.06     | 0.249   |
| ApoJ (ug/mL)        | 0.00         | 0.00-0.00     | 0.00      | 0.00-37.70     | 0.750   |
| ApoM (ug/mL)        | 26.09        | 14.81-56.95   | 71.54     | 35.71-219.71   | 0.148   |
| AOPP                | 0.00         | 0.00-0.00     | 2.28      | 0.00-5.96      | 0.211   |
| T3 (pg/mL)          | 3.26         | 2.56-3.89     | 3.83      | 3.38-4.04      | 0.335   |
| T4 (ug/dL)          | 4.69         | 4.23-5.77     | 3.96      | 3.49-4.46      | 0.022   |

*AOPP: advanced oxidation protein products; Apo: apolipoprotein; IFNg: interferon- $\gamma$ ; IL: interleukin; IQR: interquartile range; oxLDL: oxidized low-density lipoprotein; T3: triiodothyronine; T4: thyroxine; TNF: tumor necrosis factor*

**Table S6. Postoperative laboratory parameters**

| <b>Laboratory values</b> | <b>Median</b> | <b>IQR (25-75)</b> |
|--------------------------|---------------|--------------------|
| Sodium (mmol/L)          |               |                    |
| PD 1                     | 143.50        | (140.25-144.75)    |
| PD 2                     | 141.50        | (139.00-144.00)    |
| PD 3                     | 139.50        | (138.00-143.00)    |
| Potassium (mmol/L)       |               |                    |
| PD 1                     | 4.65          | (3.87-5.00)        |
| PD 2                     | 4.95          | (4.80-5.40)        |
| PD 3                     | 4.95          | (4.70-5.47)        |
| AST (UI/L)               |               |                    |
| PD 1                     | 53.50         | (24.75-100.50)     |
| PD 2                     | 101.00        | (72.50-121.00)     |
| PD 3                     | 109.50        | (73.00-155.25)     |
| ALT (UI/L)               |               |                    |
| PD 1                     | 26.00         | (18.25-36.00)      |
| PD 2                     | 23.50         | (20.75-39.00)      |
| PD 3                     | 31.00         | (26.50-50.25)      |
| GGT (UI/L)               |               |                    |
| PD 1                     | 50.00         | (35.00-158.00)     |
| PD 2                     | 70.00         | (27.00-114.00)     |
| PD 3                     | 64.50         | (35.25-82.50)      |
| ALP (UI/L)               |               |                    |
| PD 1                     | 60.00         | (47.00-73.00)      |
| PD 2                     | 53.00         | (41.50-88.25)      |
| PD 3                     | 59.00         | (52.00-71.50)      |
| LDH (UI/L)               |               |                    |
| PD 1                     | 427.50        | (300.75-959.50)    |
| PD 2                     | 929.00        | (789.00-1147.00)   |
| PD 3                     | 947.00        | (771.00-1272.50)   |
| Total Bilirubin (μmol/L) |               |                    |
| PD 1                     | 22.70         | (16.77-37.65)      |
| PD 2                     | 15.40         | (13.90-25.38)      |
| PD 3                     | 15.00         | (12.10-25.20)      |
| Albumin (g/dl)           |               |                    |
| PD 1                     | 33.80         | (31.40-46.40)      |
| PD 2                     | 32.30         | (28.40-37.30)      |
| PD 3                     | 33.05         | (27.03-36.13)      |
| Total Protein (g/dl)     |               |                    |
| PD 1                     | 50.90         | (44.95-53.55)      |
| PD 2                     | 51.75         | (45.50-55.33)      |

ALP: alkaline phosphatase; ALT: alanine transaminase; AST: aspartate aminotransferase;  
GGT: gamma-glutamyl transpeptidase; LDH: lactate dehydrogenase; PD: postoperative day
